# Supplementary material
Source: Springer Nature journal article supplement (http://www.nature.com/nature/journal/v428/n6983/extref/S7_DupBlocks/scer_pairs_15.pdf)

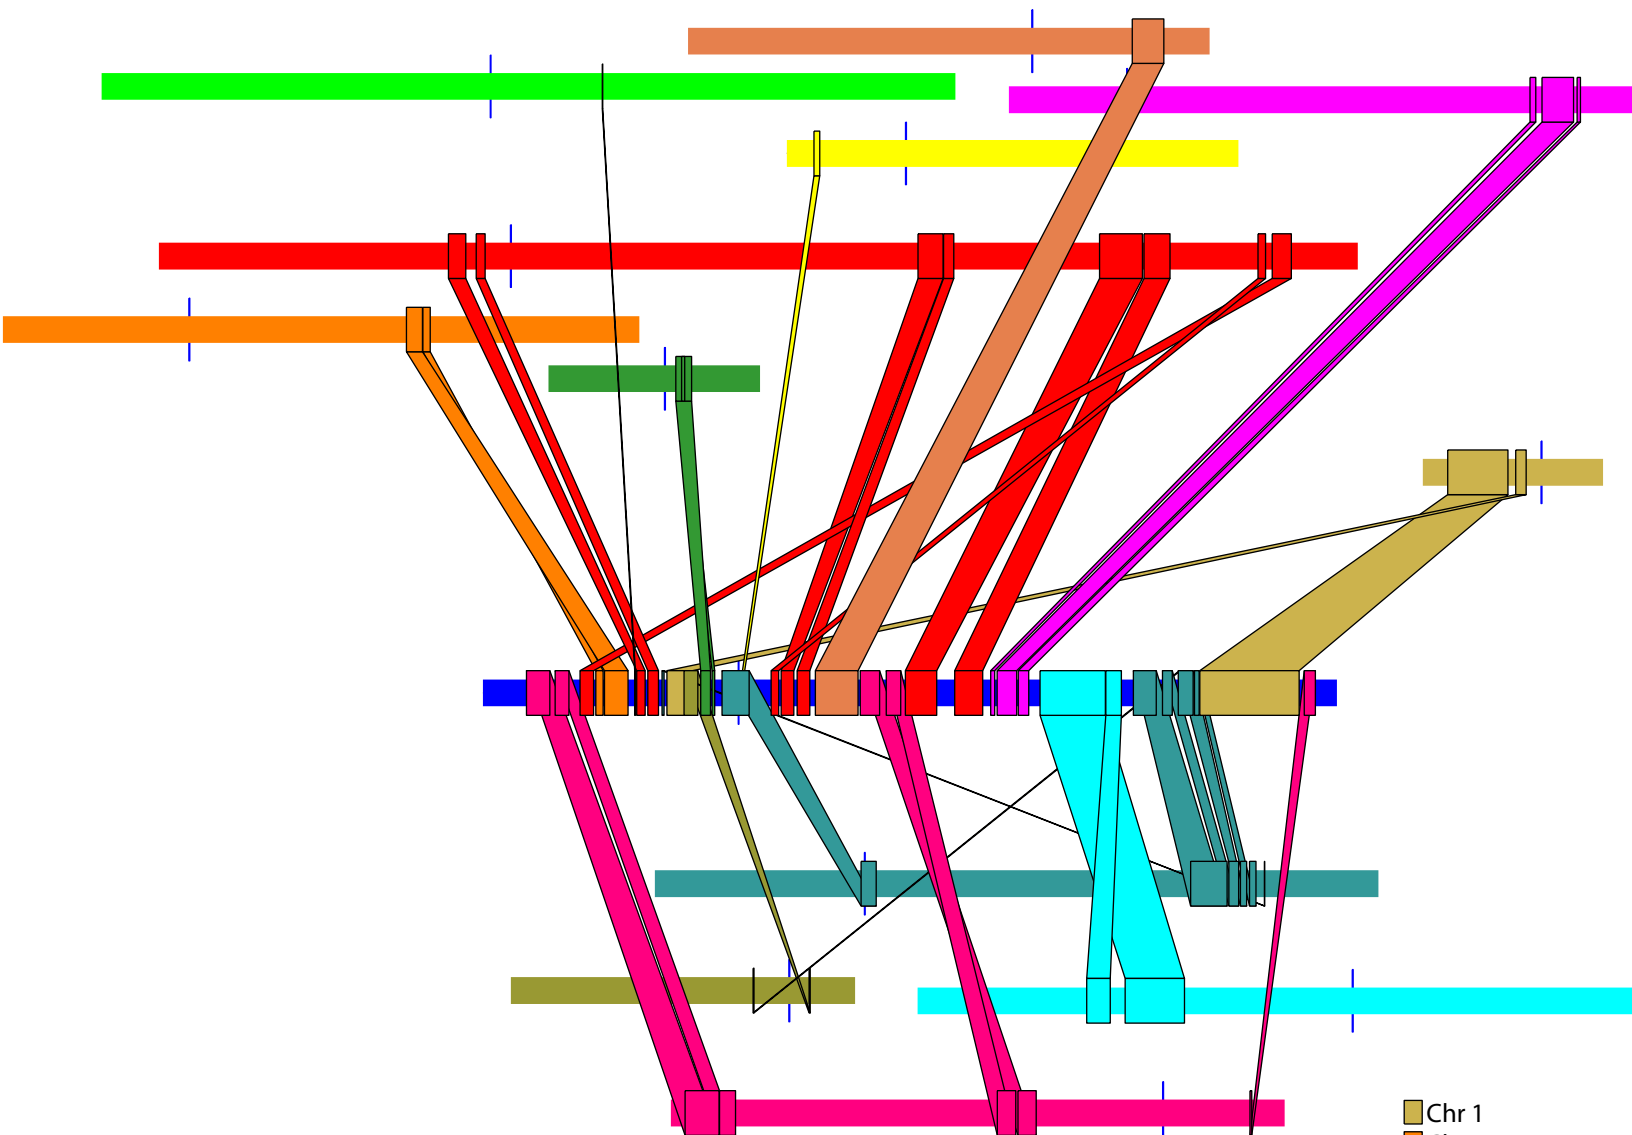

- Chr 1
- Chr 2
- Chr 3
- Chr 4
- Chr 5
- Chr 6
- Chr 7
- Chr 8
- Chr 9
- Chr 10
- Chr 11
- Chr 12
- Chr 13
- Chr 14
- Chr 15
- Chr 16

Supplement: scer_pairs_15.pdf [file scer_pairs_15.pdf]
